# Supplementary material for: Expression of matrix metalloproteinases to induce the expression of genes associated with apoptosis during corpus luteum development in bovine
Source: PeerJ. 2019 Jan 30;7:e6344. doi: 10.7717/peerj.6344 (PMC6361312; doi:10.7717/peerj.6344)
Supplement: Supplemental Information 1 [file peerj-07-6344-s001.xlsx]

## Sheet: Plate 4 - Sheet1
Software Version	2.00.18
Plate Number	Plate 4
Date	2016-10-19
Time	오후 7:09:28
Reader Type:	Epoch
Reader Serial Number:	264864
Reading Type	Reader
Procedure Details
Plate Type	96 WELL PLATE
Read	Absorbance Endpoint
	Full Plate
	Wavelengths: 450
	Read Speed: Normal, Delay: 100 msec, Measurements/Data Point: 8
Results
Actual Temperature:	0
		1	2	3	4	5	6	7	8	9	10	11	12
	A	2.424	2.6	0.6	0.589	0.338	0.044	0.044	0.044	0.044	0.044	0.044	0.044	450
	B	2.384	2.696	0.767	0.583	0.34	0.041	0.041	0.041	0.041	0.041	0.041	0.041	450
	C	2.573	2.718	0.647	0.497	0.379	0.043	0.043	0.043	0.043	0.043	0.043	0.043	450
	D	2.456	2.688	0.593	0.498	0.331	0.042	0.042	0.042	0.042	0.042	0.042	0.042	450
	E	2.363	0.415	0.35	0.432	0.041	0.044	0.044	0.044	0.044	0.044	0.044	0.044	450
	F	2.714	0.379	0.446	0.435	0.043	0.038	0.038	0.038	0.038	0.038	0.038	0.038	450
	G	2.803	0.35	0.381	0.387	0.039	0.038	0.038	0.038	0.038	0.038	0.038	0.038	450
	H	2.787	0.318	0.416	0.375	0.043	0.048	0.048	0.048	0.048	0.048	0.048	0.048	450
Samples Name:	Ovary	CH1	CH2	CL3	CL2	CL1
Target Protein:	FSH	LH	mTOR
