# Supplementary material for: Expression of matrix metalloproteinases to induce the expression of genes associated with apoptosis during corpus luteum development in bovine
Source: PeerJ. 2019 Jan 30;7:e6344. doi: 10.7717/peerj.6344 (PMC6361312; doi:10.7717/peerj.6344)
Supplement: Supplemental Information 3 [file peerj-07-6344-s003.xlsx]

## Sheet: Raw-18sr
Quantitation Report
Experiment Information
Run Name	Three Step with Melt 2016-07-11 (N&L cell 18sr)
Run Start	206-07-11오후 4:17:45
Run Finish	2016-07-11 오후 5:38:32
Operator
Notes
Run On Software Version	Rotor-Gene 6.1.93
Run Signature	The Run Signature is valid.
Gain FAM	10
Quantitation Information
Threshold	0.22344
Left Threshold	1
Standard Curve Imported	No
Standard Curve (1)	N/A
Standard Curve (2)	N/A
Start normalising from cycle	1
Noise Slope Correction	No
No Template Control Threshold	0
Reaction Efficiency Threshold	Disabled
Normalisation Method	Standard
Digital Filter	Light
Sample Page	Page 1
Imported Analysis Settings
Messages
Message
Profile
Cycle	Cycle Point
Hold @ 95°c, 10 min 0 secs
Cycling (40 repeats)	Step 1 @ 95°c, hold 10 secs
	Step 2 @ 63°c, hold 15 secs
	Step 3 @ 72°c, hold 20 secs, acquiring to Cycling A(FAM)
Melt (72-95°c) , hold 45 secs on the 1st step, hold 5 secs on next steps, Melt A(FAM)
Raw Data For Cycling A.FAM
No.	Colour	Name	Type	Ct	Ct2
1		N24	Unknown	29.25	29.21
2		N48	Unknown	28.84	28.72
3		N72	Unknown	28.91	29.29
4		N96	Unknown	29.14	29.15
5		L24	Unknown	29.22	29.22
6		L48	Unknown	29.23	29.36
7		L72	Unknown	29.21	29.33
8		L96	Unknown	29.57	29.35

## Sheet: Raw-MMP-2
Quantitation Report
Experiment Information
Run Name	Three Step with Melt 2016-07-12 (N&Lcell-MMP2)
Run Start	2010-07-12 오후 8:14:38
Run Finish	2010-07-12 오후 9:32:30
Operator
Notes
Run On Software Version	Rotor-Gene 6.1.93
Run Signature	The Run Signature is valid.
Gain FAM	10
Quantitation Information
Threshold	0.13767
Left Threshold	1
Standard Curve Imported	No
Standard Curve (1)	N/A
Standard Curve (2)	N/A
Start normalising from cycle	1
Noise Slope Correction	No
No Template Control Threshold	0
Reaction Efficiency Threshold	Disabled
Normalisation Method	Standard
Digital Filter	Light
Sample Page	Page 1
Imported Analysis Settings
Messages
Message
Profile
Cycle	Cycle Point
Hold @ 95°c, 10 min 0 secs
Cycling (40 repeats)	Step 1 @ 95°c, hold 10 secs
	Step 2 @ 66°c, hold 15 secs
	Step 3 @ 72°c, hold 20 secs, acquiring to Cycling A(FAM)
Melt (72-95°c) , hold 45 secs on the 1st step, hold 5 secs on next steps, Melt A(FAM)
Raw Data For Cycling A.FAM
No.	Colour	Name	Type	Ct	Ct2
1		N24	Unknown	32.8	31.73
2		N48	Unknown	32.55	32.39
3		N72	Unknown	32.44	31.91
4		N96	Unknown	32.26	31.39
5		L24	Unknown	32.6	33.27
6		L48	Unknown	31.89	32.34
7		L72	Unknown	31.23	31.99
8		L96	Unknown	31.11	31.15

## Sheet: Raw-TIMP-2
Quantitation Report
Experiment Information
Run Name	Three Step with Melt 2016-07-12 (N&Lcell TIMP2)
Run Start	2016-07-12 오후 4:57:07
Run Finish	2016-07-12 오후 6:25:00
Operator
Notes
Run On Software Version	Rotor-Gene 6.1.93
Run Signature	The Run Signature is valid.
Gain FAM	10
Quantitation Information
Threshold	0.18127
Left Threshold	1
Standard Curve Imported	No
Standard Curve (1)	N/A
Standard Curve (2)	N/A
Start normalising from cycle	1
Noise Slope Correction	No
No Template Control Threshold	0
Reaction Efficiency Threshold	Disabled
Normalisation Method	Standard
Digital Filter	Light
Sample Page	Page 1
Imported Analysis Settings
Messages
Message
Profile
Cycle	Cycle Point
Hold @ 95°c, 10 min 0 secs
Cycling (40 repeats)	Step 1 @ 95°c, hold 10 secs
	Step 2 @ 58.2°c, hold 15 secs
	Step 3 @ 72°c, hold 20 secs, acquiring to Cycling A(FAM)
Melt (72-95°c) , hold 45 secs on the 1st step, hold 5 secs on next steps, Melt A(FAM)
Raw Data For Cycling A.FAM
No.	Colour	Name	Type	Ct	Ct2
1		N24	Unknown	25.79	26.94
2		N48	Unknown	26.51	26.68
3		N72	Unknown	26.51	26.54
4		N96	Unknown	26.21	26.21
5		L24	Unknown	25.74	24.98
6		L48	Unknown	27.29	27.66
7		L72	Unknown	28.54	28.66
8		L96	Unknown	29.11	29.36

## Sheet: Raw-MMP-9
Quantitation Report
Experiment Information
Run Name	Three Step with Melt 2010-07-12 (N&LcellMMP9)
Run Start	2010-07-12 오전 6:23:17
Run Finish	2010-07-12 오전 7:43:27
Operator
Notes
Run On Software Version	Rotor-Gene 6.1.93
Run Signature	The Run Signature is valid.
Gain FAM	10
Quantitation Information
Threshold	0.1799
Left Threshold	1
Standard Curve Imported	No
Standard Curve (1)	N/A
Standard Curve (2)	N/A
Start normalising from cycle	1
Noise Slope Correction	No
No Template Control Threshold	0
Reaction Efficiency Threshold	Disabled
Normalisation Method	Standard
Digital Filter	Light
Sample Page	Page 1
Imported Analysis Settings
Messages
Message
Profile
Cycle	Cycle Point
Hold @ 95°c, 10 min 0 secs
Cycling (40 repeats)	Step 1 @ 95°c, hold 10 secs
	Step 2 @ 64°c, hold 15 secs
	Step 3 @ 72°c, hold 20 secs, acquiring to Cycling A(FAM)
Melt (72-95°c) , hold 45 secs on the 1st step, hold 5 secs on next steps, Melt A(FAM)
Raw Data For Cycling A.FAM
No.	Colour	Name	Type	Ct	Ct2
1		N24	Unknown	32.55	32.52
2		N48	Unknown	32.67	35.69
3		N72	Unknown	35.47	35.57
4		N96	Unknown	35.52	35.48
5		L24	Unknown	29.88	29.85
6		L48	Unknown	27.07	27.09
7		L72	Unknown	32.58	32.57
8		L96	Unknown	33.06	33.28

## Sheet: Raw-TIMP-3
Quantitation Report
Experiment Information
Run Name	Three Step with Melt 2016-07-12 (N&LcellTIMP3)
Run Start	2016-07-12 오전 8:23:17
Run Finish	2010-07-12 오전 10:43:27
Operator
Notes
Run On Software Version	Rotor-Gene 6.1.93
Run Signature	The Run Signature is valid.
Gain FAM	10
Quantitation Information
Threshold	0.1799
Left Threshold	1
Standard Curve Imported	No
Standard Curve (1)	N/A
Standard Curve (2)	N/A
Start normalising from cycle	1
Noise Slope Correction	No
No Template Control Threshold	0
Reaction Efficiency Threshold	Disabled
Normalisation Method	Standard
Digital Filter	Light
Sample Page	Page 1
Imported Analysis Settings
Messages
Message
Profile
Cycle	Cycle Point
Hold @ 95°c, 10 min 0 secs
Cycling (40 repeats)	Step 1 @ 95°c, hold 10 secs
	Step 2 @ 60°c, hold 15 secs
	Step 3 @ 72°c, hold 20 secs, acquiring to Cycling A(FAM)
Melt (72-95°c) , hold 45 secs on the 1st step, hold 5 secs on next steps, Melt A(FAM)
Raw Data For Cycling A.FAM
No.	Colour	Name	Type	Ct	Ct2
1		N24	Unknown	31.04	31.05
2		N48	Unknown	29.2	31.04
3		N72	Unknown	32.05	31.67
4		N96	Unknown	32.39	32.01
5		L24	Unknown	30.35	30.39
6		L48	Unknown	30.92	30.05
7		L72	Unknown	30.22	29.31
8		L96	Unknown	30.22	30.32

## Sheet: Raw-mTOR
Quantitation Report
Experiment Information
Run Name	Three Step with Melt 2016-0713 (N&LcellmTOR,)
Run Start	2016-07-13 오후 11:57:09
Run Finish	2016-07-14 오전 1:15:16
Operator
Notes
Run On Software Version	Rotor-Gene 6.1.93
Run Signature	The Run Signature is valid.
Gain FAM	10
Quantitation Information
Threshold	0.15263
Left Threshold	1
Standard Curve Imported	No
Standard Curve (1)	N/A
Standard Curve (2)	N/A
Start normalising from cycle	1
Noise Slope Correction	No
No Template Control Threshold	0
Reaction Efficiency Threshold	Disabled
Normalisation Method	Standard
Digital Filter	Light
Sample Page	Page 1
Imported Analysis Settings
Messages
Message
Profile
Cycle	Cycle Point
Hold @ 95°c, 10 min 0 secs
Cycling (40 repeats)	Step 1 @ 95°c, hold 10 secs
	Step 2 @ 58°c, hold 15 secs
	Step 3 @ 72°c, hold 20 secs, acquiring to Cycling A(FAM)
Melt (72-95°c) , hold 45 secs on the 1st step, hold 5 secs on next steps, Melt A(FAM)
Raw Data For Cycling A.FAM
No.	Colour	Name	Type	Ct	Ct2
1		N24	Unknown	32.9	32.85
2		N48	Unknown	33.45	34.34
3		N72	Unknown	36.45	36.92
4		N96	Unknown	37.25	37.35
5		L24	Unknown	35.83	35.75
6		L48	Unknown	36.35	36.22
7		L72	Unknown	37.73	37.58
8		L96	Unknown	38.62	38.52

## Sheet: Raw-Casp-3
Quantitation Report
Experiment Information
Run Name	Three Step with Melt 2016-07-14 (N&Lcell-Casp)
Run Start	2016-07-14 오후 9:15:16
Run Finish	2016-07-15 오후 11:32:30
Operator
Notes
Run On Software Version	Rotor-Gene 6.1.93
Run Signature	The Run Signature is valid.
Gain FAM	10
Quantitation Information
Threshold	0.13767
Left Threshold	1
Standard Curve Imported	No
Standard Curve (1)	N/A
Standard Curve (2)	N/A
Start normalising from cycle	1
Noise Slope Correction	No
No Template Control Threshold	0
Reaction Efficiency Threshold	Disabled
Normalisation Method	Standard
Digital Filter	Light
Sample Page	Page 1
Imported Analysis Settings
Messages
Message
Profile
Cycle	Cycle Point
Hold @ 95°c, 10 min 0 secs
Cycling (40 repeats)	Step 1 @ 95°c, hold 10 secs
	Step 2 @ 54°c, hold 15 secs
	Step 3 @ 72°c, hold 20 secs, acquiring to Cycling A(FAM)
Melt (72-95°c) , hold 45 secs on the 1st step, hold 5 secs on next steps, Melt A(FAM)
Raw Data For Cycling A.FAM
No.	Colour	Name	Type	Ct	Ct2
1		N24	Casp-3	31.85	31.81
2		N48	casp-3	32.65	32.66
3		N72	Casp-3	32.44	31.91
4		N96	Casp-3	32.26	31.39
5		L24	Casp-3	31.65	32.27
6		L48	Casp-3	30.89	31.34
7		L72	Casp-3	30.23	30.89
8		L96	Casp-3	30.1	30.11

## Sheet: Raw-HSD
Quantitation Report
Experiment Information
Run Name	Three Step with Melt 2016-07-14 (N&Lcell HSD)
Run Start	2016-07-14 오전 9:15:16
Run Finish	2016-07-14 오전 11:15:16
Operator
Notes
Run On Software Version	Rotor-Gene 6.1.93
Run Signature	The Run Signature is valid.
Gain FAM	10
Quantitation Information
Threshold	0.15263
Left Threshold	1
Standard Curve Imported	No
Standard Curve (1)	N/A
Standard Curve (2)	N/A
Start normalising from cycle	1
Noise Slope Correction	No
No Template Control Threshold	0
Reaction Efficiency Threshold	Disabled
Normalisation Method	Standard
Digital Filter	Light
Sample Page	Page 1
Imported Analysis Settings
Messages
Message
Profile
Cycle	Cycle Point
Hold @ 95°c, 10 min 0 secs
Cycling (40 repeats)	Step 1 @ 95°c, hold 10 secs
	Step 2 @ 66°c, hold 15 secs
	Step 3 @ 72°c, hold 20 secs, acquiring to Cycling A(FAM)
Melt (72-95°c) , hold 45 secs on the 1st step, hold 5 secs on next steps, Melt A(FAM)
Raw Data For Cycling A.FAM
No.	Colour	Name	Type	Ct	Ct2
1		N24	Unknown	22.87	22.85
2		N48	Unknown	22.78	22.88
3		N72	Unknown	21.78	21.95
4		N96	Unknown	21.11	21.22
5		L24	Unknown	22.24	22.75
6		L48	Unknown	22.85	22.22
7		L72	Unknown	21.26	21.25
8		L96	Unknown	21.22	21.52

## Sheet: Raw-P4-r
Quantitation Report
Experiment Information
Run Name	Three Step with Melt 2016-07-14(N&LcellPAPP-A)
Run Start	2016-07-14 오후 3:15:16
Run Finish	2016-07-14 오후 5:32:30
Operator
Notes
Run On Software Version	Rotor-Gene 6.1.93
Run Signature	The Run Signature is valid.
Gain FAM	10
Quantitation Information
Threshold	0.1799
Left Threshold	1
Standard Curve Imported	No
Standard Curve (1)	N/A
Standard Curve (2)	N/A
Start normalising from cycle	1
Noise Slope Correction	No
No Template Control Threshold	0
Reaction Efficiency Threshold	Disabled
Normalisation Method	Standard
Digital Filter	Light
Sample Page	Page 1
Imported Analysis Settings
Messages
Message
Profile
Cycle	Cycle Point
Hold @ 95°c, 10 min 0 secs
Cycling (40 repeats)	Step 1 @ 95°c, hold 10 secs
	Step 2 @ 64°c, hold 15 secs
	Step 3 @ 72°c, hold 20 secs, acquiring to Cycling A(FAM)
Melt (72-95°c) , hold 45 secs on the 1st step, hold 5 secs on next steps, Melt A(FAM)
Raw Data For Cycling A.FAM
No.	Colour	Name	Type	Ct	Ct2
1		N24	Unknown	32.55	32.52
2		N48	Unknown	32.67	35.69
3		N72	Unknown	35.47	35.57
4		N96	Unknown	35.52	35.48
5		L24	Unknown	29.88	29.85
6		L48	Unknown	27.07	27.09
7		L72	Unknown	32.58	32.57
8		L96	Unknown	33.06	33.28
